# Supplementary material for: Apolipoprotein A1: a novel serum biomarker for predicting the prognosis of hepatocellular carcinoma after curative resection
Source: PubMed Central journal article supplement (PMC5342581; doi:10.18632/oncotarget.12203), 2016-09-23
Supplement: oncotarget-07-70654-s001.pdf [file oncotarget-07-70654-s001.pdf]

# Apolipoprotein A1: a novel serum biomarker for predicting the prognosis of hepatocellular carcinoma after curative resection

## SUPPLEMENTARY FIGURES AND TABLES

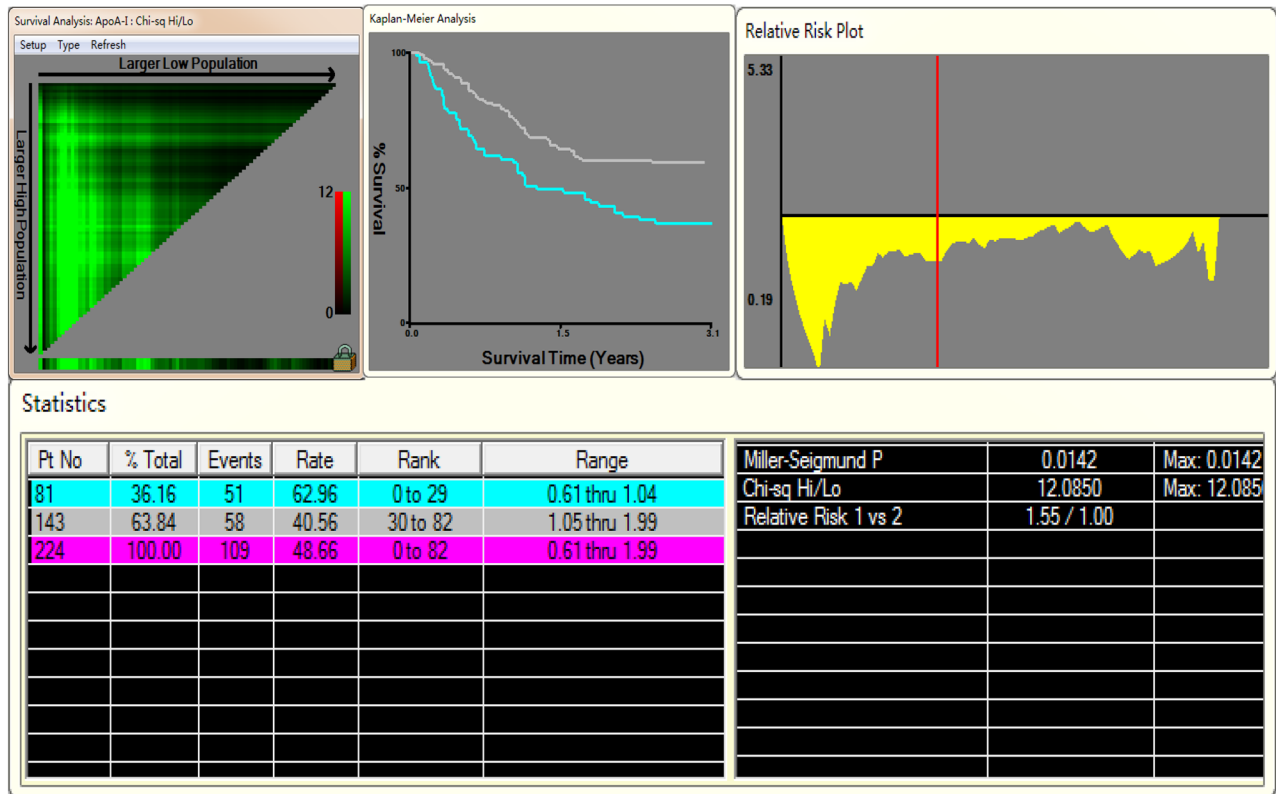

Supplementary Figure S1: The optimal cutoff value of serum ApoA-1 levels was selected by X-tile3.6.1 software (Yale University, New Haven, CT, USA).

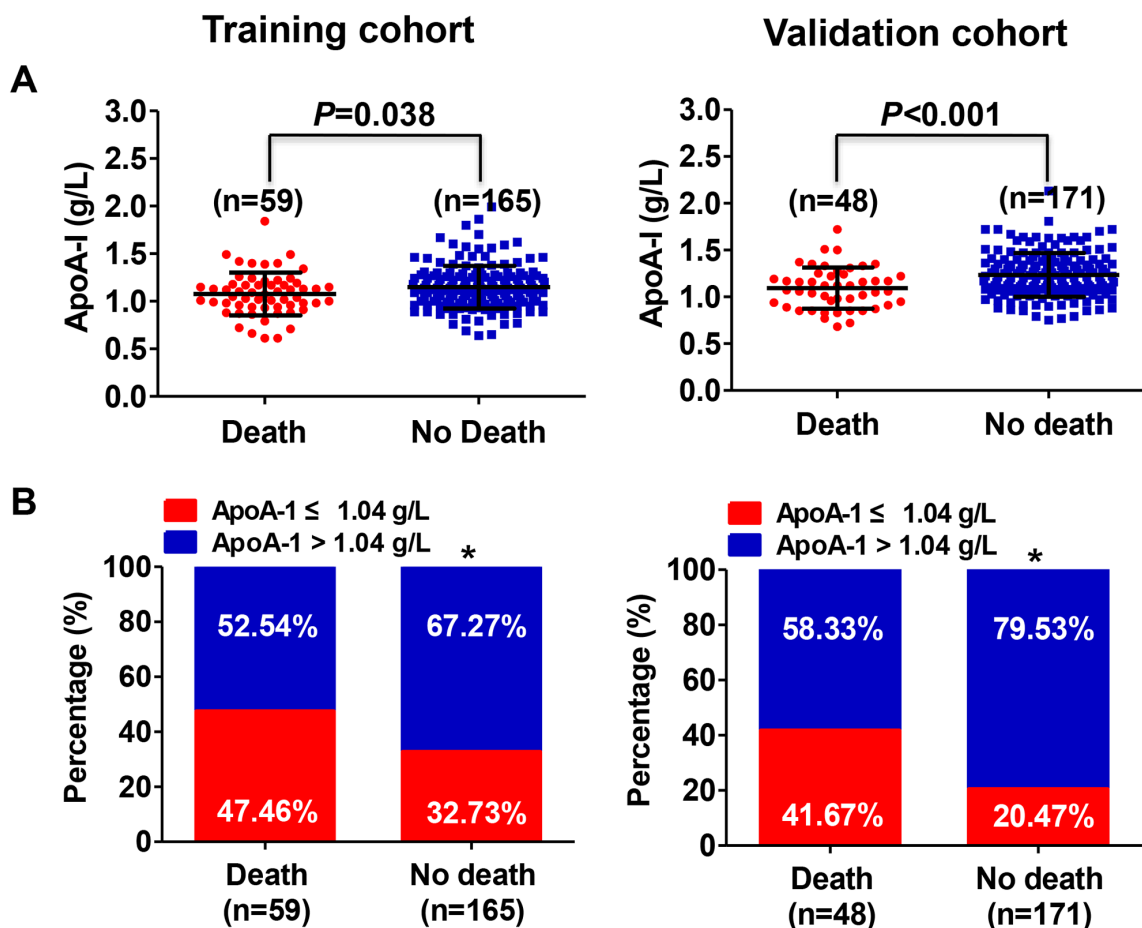

**Supplementary Figure S2: Survival significance of serum ApoA-1 levels in HCC patients underwent curative resection.** Distribution of serum ApoA-1 levels in dead and living patients from the training cohort (A. left) and from the validation cohort (A. right). Serum ApoA-1-positive rate in patients who died and living patients from the training cohort (B. left) and from the validation cohort (B. right) (\* $P < 0.05$ ).

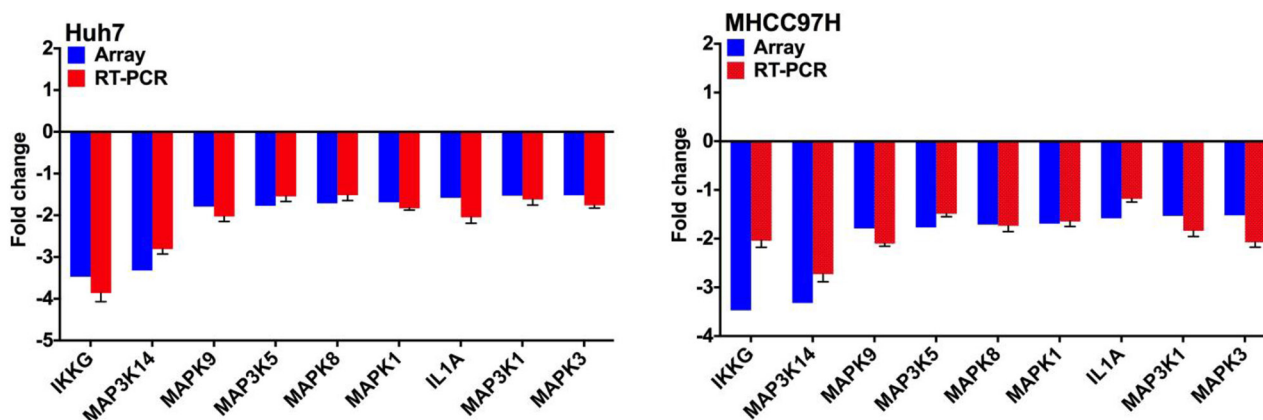

**Supplementary Figure S3: Validation of the results from PCR array.** Abbreviations: HCC, hepatocellular carcinoma; ApoA-1, Apolipoprotein A1.

**Supplementary Table S1: Different expressed apoptosis-related genes in HCC cells after treating with ApoA-1.**

**See Supplementary File 1**

**Supplementary Table S2: Primers for RT-PCR.**

**See Supplementary File 2**
